# Supplementary material for: Modeling the Insertion Mechanics of Flexible Neural Probes Coated with Sacrificial Polymers for Optimizing Probe Design
Source: MDPI journal article supplement (doi:10.3390/s16030330), 2016-03-04
Supplement: s1 [file s1]

# Supplementary Materials: Modeling the Insertion Mechanics of Flexible Neural Probes Coated with Sacrificial Polymers for Optimizing Probe Design

Sagar Singh, Meng-Chen Lo, Vinod B. Damodaran, Hilton M. Kaplan, Joachim Kohn, Jeffrey D. Zahn and David I. Shreiber

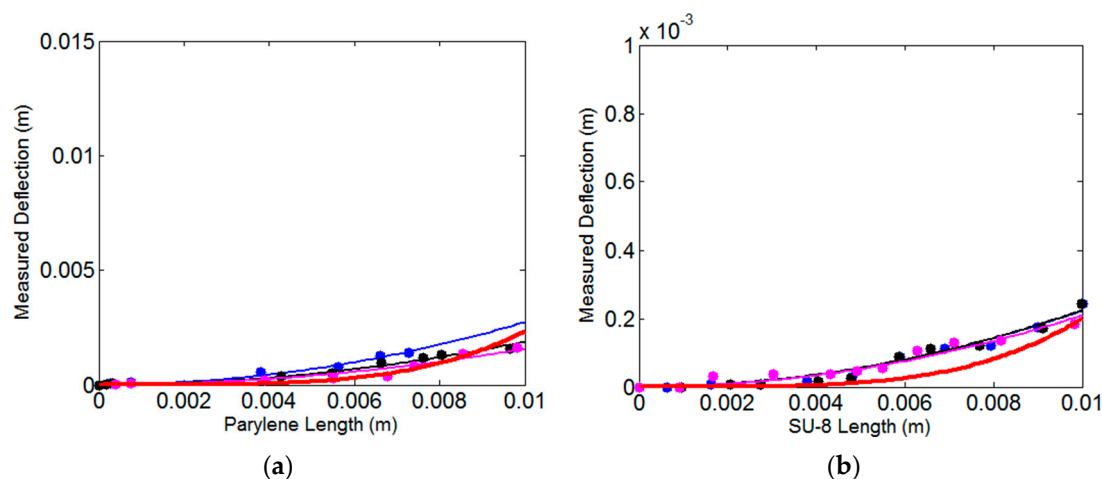

**Figure S1.** Deflection profiles for (A) Parylene C and (B) SU-8. Curve fitting was used to fit the image-acquired data to the complete beam deflection equation to extract the flexural Young's modulus. The red curve is the resultant fit when the maximum deflection and corresponding flexural modulus ( $E_{\text{Parylene}} = 5.6 \text{ MPa}$ ,  $E_{\text{SU-8}} = 2.4 \text{ GPa}$ ) were used.

**Table S1.** Flexural Young's moduli extracted from deflection tests performed on strips of Parylene C and SU-8 photoresist. To determine the flexural Young's moduli, deflection data measured from images of the freely hanging strips were plotted and fitted with the complete beam deflection equation.

| Material (Length)                                              | Flexural Young's Modulus | Correlation Coefficient |
|----------------------------------------------------------------|--------------------------|-------------------------|
| Parylene C (1.0 cm $\times$ 1.0 cm $\times$ 20 $\mu\text{m}$ ) | 3.39 $\pm$ 1.26 MPa      | 0.854                   |
| Parylene C (2.0 cm $\times$ 1.0 cm $\times$ 20 $\mu\text{m}$ ) | 5.89 $\pm$ 0.58 MPa      | 0.949                   |
| Parylene C (3.0 cm $\times$ 1.0 cm $\times$ 20 $\mu\text{m}$ ) | 4.71 $\pm$ 0.06 MPa      | 0.936                   |
| SU-8 (0.5 cm $\times$ 0.5 cm $\times$ 20 $\mu\text{m}$ )       | 2.10 $\pm$ 0.24 GPa      | 0.985                   |
| SU-8 (1.0 cm $\times$ 0.5 cm $\times$ 20 $\mu\text{m}$ )       | 1.87 $\pm$ 0.33 GPa      | 0.977                   |
